# Supplementary material for: Source and genesis of Ca-Cl type brines in Qaidam Basin, Qinghai-Tibetan Plateau: evidence from hydrochemistry as well as B and Li isotopes
Source: Frontiers journal article supplement (doi:10.3389/fenvs.2023.1248294), 2024-01-04
Supplement: Data_Sheet_1.docx [file Data_Sheet_1.docx]

Supplementary Appendix SAChemical compositions of Ca-Cl brines in the Qaidam Basin.

| Sample No. | Brine type | TDS  (mg·L-1) | K+  (mg·L-1) | Na+  (mg·L-1) | Ca2+  (mg·L-1) | Mg2+  (mg·L-1) | Cl-  (mg·L-1) | SO42-  (mg·L-1) | HCO3-  (mg·L-)1 | B2O3  (mg·L-1) | Br-  (mg·L-1) | Li+  (mg·L-1) | Sr2+  (mg·L-1) | Reference |
| --- | --- | --- | --- | --- | --- | --- | --- | --- | --- | --- | --- | --- | --- | --- |
| N6 | CaCl2 | 118700.00 | 8230.00 | 87761.00 | 17094.00 | 1083.00 | 176248.00 | 254.10 | 56.75 | 2213.00 | 0.20 | 258.10 | 1543.00 | This study |
| N13 | CaCl2 | 112300.00 | 5292.00 | 85856.00 | 15404.00 | 1514.00 | 168005.00 | 291.40 | 157.20 | 2430.00 | 1.30 | 229.50 | 982.40 | This study |
| S38 | CaCl2 | 108000.00 | 3478.00 | 76127.00 | 261.40 | 8390.00 | 130714.00 | 15725.00 | 1789.00 | 2084.00 | 2.20 | 10.37 | 10.12 | This study |
| JS1 | CaCl2 | 140700.00 | 1960.00 | 48010.00 | 3940.00 | 410.00 | 82230.00 | 830.00 | 210.00 | 3197.63 | 59.25 | 104.60 | 264.20 | This study |
| L2 | CaCl2 | 151850.00 | 1220.00 | 47500.00 | 7300.00 | 860.00 | 88820.00 | 570.00 | 160.00 | 1733.09 | 59.75 | 57.90 | 420.90 | This study |
| E2 | CaCl2 | 70720.00 | 480.00 | 23830.00 | 2570.00 | 370.00 | 40870.00 | 1320.00 | 280.00 | 1539.24 | 35.17 | 20.00 | 129.50 | This study |
| HZK01 | CaCl2 | 238700.00 | 650.00 | 84290.00 | 5920.00 | 1230.00 | 143510.00 | 520.00 | 190.00 | 1120.62 | 30.68 | 9.00 | 547.50 | This study |
| YC2 | CaCl2 | 124800.00 | 610.00 | 39590.00 | 6220.00 | 890.00 | 74150.00 | 810.00 | 90.00 | 866.23 | 54.25 | 22.00 | 302.00 | This study |
| DY-01 | CaCl2 | 171680.00 | 1877.00 | 58816.15 | 4730.96 | 700.80 | 102260.23 | 515.60 | 212.43 | 1642.84 | 63.37 | 133.00 | 308.30 | This study |
| DY-02 | CaCl2 | 174472.50 | 1965.75 | 59656.45 | 5135.43 | 905.87 | 103152.48 | 314.75 | 118.82 | 1965.01 | 101.07 | 4.15 | 414.25 | This study |
| DY-03 | CaCl2 | 180605.06 | 280.75 | 65245.10 | 3461.31 | 819.19 | 107895.12 | 75.80 | 230.10 | 1218.77 | 159.22 | 12.10 | 423.00 | This study |
| DY-04 | CaCl2 | 182247.96 | 848.30 | 67555.07 | 1947.61 | 466.30 | 108702.41 | 484.90 | 354.06 | 1405.85 | 102.74 | 12.07 | 269.50 | This study |
| DY-05 | CaCl2 | 181608.97 | 758.25 | 66593.83 | 2388.68 | 580.10 | 107217.60 | 304.00 | 346.60 | 1569.75 | 105.21 | 16.60 | 395.50 | This study |
| DY-06 | CaCl2 | 180333.06 | 775.75 | 66458.52 | 2209.65 | 548.67 | 106624.77 | 342.25 | 370.94 | 1519.84 | 123.34 | 14.58 | 362.75 | This study |
| DY-07 | CaCl2 | 178667.99 | 764.25 | 65977.33 | 2190.80 | 471.51 | 105693.18 | 315.25 | 411.51 | 1438.54 | 123.41 | 13.00 | 353.00 | This study |
| DY-08 | CaCl2 | 180572.07 | 784.75 | 66824.74 | 2122.49 | 442.93 | 106624.77 | 517.50 | 486.86 | 1433.71 | 138.06 | 11.53 | 304.75 | This study |
| DY-09 | CaCl2 | 182315.92 | 676.50 | 65277.14 | 2365.13 | 564.67 | 105269.73 | 220.73 | 399.92 | 1361.26 | 61.57 | 12.75 | 280.75 | This study |
| DY-10 | CaCl2 | 176844.60 | 637.50 | 65172.10 | 2332.15 | 487.23 | 104761.59 | 307.25 | 430.06 | 1307.32 | 111.62 | 9.60 | 359.50 | This study |
| DY-11 | CaCl2 | 178811.83 | 615.75 | 65354.75 | 2428.73 | 555.81 | 105269.73 | 393.25 | 381.95 | 1395.07 | 75.72 | 13.48 | 374.00 | This study |
| DY-12 | CaCl2 | 178828.51 | 615.25 | 65463.66 | 2514.01 | 614.96 | 105777.87 | 330.00 | 457.88 | 1379.77 | 97.12 | 11.70 | 274.75 | This study |
| DY-13 | CaCl2 | 178284.22 | 657.75 | 65907.31 | 2169.13 | 548.67 | 105777.87 | 197.00 | 359.35 | 1453.83 | 147.20 | 9.83 | 245.25 | This study |
| DY-14 | CaCl2 | 178405.61 | 662.25 | 65833.74 | 2291.63 | 516.66 | 105777.87 | 139.48 | 359.35 | 1509.38 | 164.31 | 11.25 | 262.25 | This study |
| DY-15 | CaCl2 | 179704.39 | 689.00 | 66264.62 | 2295.40 | 506.37 | 105947.25 | 698.50 | 457.88 | 1533.53 | 165.77 | 14.73 | 260.00 | This study |
| DY-16 | CaCl2 | 183281.27 | 856.75 | 68700.43 | 1445.46 | 334.92 | 107386.98 | 1209.50 | 353.55 | 1678.43 | 164.97 | 20.38 | 263.75 | This study |
| DY-17 | CaCl2 | 187146.93 | 692.00 | 67415.89 | 2018.37 | 524.66 | 107471.67 | 517.75 | 405.72 | 1514.21 | 53.15 | 14.08 | 198.10 | This study |
| DY-18 | CaCl2 | 180492.96 | 547.75 | 66946.92 | 2110.71 | 469.80 | 106794.15 | 431.75 | 301.39 | 1467.52 | 91.87 | 7.60 | 214.65 | This study |
| DY-19 | CaCl2 | 178309.03 | 687.50 | 66642.60 | 1695.43 | 361.00 | 106703.11 | 182.80 | 334.25 | 1251.29 | 134.55 | 8.62 | 214.70 | This study |
| DY-20 | CaCl2 | 186273.40 | 568.75 | 68155.23 | 1865.72 | 480.08 | 108318.57 | 289.00 | 301.39 | 1525.48 | 62.50 | 10.98 | 189.55 | This study |
| DY-21 | CaCl2 | 185908.83 | 592.00 | 69078.89 | 1916.60 | 494.94 | 109758.31 | 334.25 | 372.10 | 1587.46 | 101.94 | 9.33 | 195.63 | This study |
| DY-22 | CaCl2 | 184980.21 | 680.25 | 68407.56 | 2114.48 | 512.09 | 108996.09 | 657.25 | 370.94 | 1557.68 | 92.22 | 10.38 | 202.13 | This study |
| DY-23 | CaCl2 | 187104.39 | 775.75 | 68599.85 | 2314.24 | 529.24 | 109588.93 | 982.50 | 370.94 | 1511.79 | 88.58 | 13.85 | 179.23 | This study |
| DY-24 | CaCl2 | 188546.82 | 540.75 | 69501.80 | 1944.87 | 534.95 | 110351.14 | 450.00 | 341.96 | 1696.94 | 131.03 | 10.13 | 211.15 | This study |
| DY-25 | CaCl2 | 188493.84 | 584.75 | 69987.51 | 2367.01 | 387.50 | 111536.80 | 377.50 | 289.80 | 1700.97 | 200.28 | 15.23 | 211.75 | This study |
| DY-26 | CaCl2 | 189068.13 | 579.00 | 69799.78 | 2393.39 | 480.08 | 111452.11 | 501.75 | 337.32 | 1688.09 | 154.50 | 14.68 | 216.93 | This study |
| DY-27 | CaCl2 | 190613.44 | 612.25 | 69324.58 | 2209.65 | 490.09 | 110351.14 | 582.00 | 301.39 | 1751.68 | 63.79 | 16.93 | 255.75 | This study |
| DY-28 | CaCl2 | 187274.48 | 779.75 | 68917.22 | 2302.93 | 524.66 | 110097.07 | 718.75 | 312.98 | 1688.89 | 140.44 | 14.85 | 226.00 | This study |
| DY-29 | CaCl2 | 187669.61 | 805.00 | 69524.67 | 2148.40 | 400.07 | 109843.00 | 1462.00 | 300.23 | 1723.51 | 145.35 | 12.75 | 268.75 | This study |
| DY-30 | CaCl2 | 185264.47 | 797.75 | 68013.80 | 2506.47 | 594.39 | 109588.93 | 420.75 | 208.65 | 1666.35 | 144.65 | 14.50 | 361.75 | This study |
| DY-31 | CaCl2 | 187095.02 | 812.75 | 68538.50 | 2729.47 | 579.15 | 110605.21 | 494.00 | 156.49 | 1796.76 | 150.19 | 20.50 | 369.25 | This study |
| DY-32 | CaCl2 | 186685.28 | 773.75 | 68977.18 | 2219.07 | 557.24 | 110435.83 | 446.00 | - | 1768.59 | 144.17 | 20.00 | 328.50 | This study |
| DY-33 | CaCl2 | 188919.54 | 837.50 | 69016.06 | 2761.42 | 633.90 | 113219.33 | 375.80 | 174.03 | 1383.63 | 87.53 | 23.15 | 356.20 | This study |
| DY-34 | CaCl2 | 187558.85 | 814.75 | 68122.04 | 2924.21 | 722.03 | 110859.28 | 347.25 | 157.65 | 1771.81 | 101.28 | 29.18 | 398.25 | This study |
| DY-35 | CaCl2 | 191833.03 | 786.25 | 68855.69 | 3128.37 | 773.47 | 112383.70 | 431.50 | 179.67 | 1787.91 | 79.76 | 31.88 | 397.50 | This study |
| DY-36 | CaCl2 | 189031.35 | 701.75 | 68930.82 | 2987.03 | 704.89 | 112044.94 | 416.50 | 168.08 | 1734.78 | 132.68 | 34.08 | 371.00 | This study |
| DY-37 | CaCl2 | 195919.23 | 833.25 | 70352.23 | 2468.78 | 545.81 | 112807.15 | 627.25 | 261.40 | 1692.11 | 65.57 | 19.18 | 263.25 | This study |
| DY-38 | CaCl2 | 196699.37 | 817.75 | 70683.13 | 3109.53 | 782.99 | 115178.47 | 523.25 | 214.45 | 1745.24 | 84.23 | 23.15 | 332.50 | This study |
| DY-39 | CaCl2 | 193561.29 | 846.50 | 70462.47 | 3046.71 | 744.89 | 114670.33 | 404.75 | 197.06 | 1813.67 | 143.94 | 28.33 | 369.00 | This study |
| DY-40 | CaCl2 | 193779.95 | 911.75 | 70049.80 | 3345.10 | 807.76 | 114839.71 | 457.25 | 191.27 | 1744.44 | 174.62 | 33.60 | 409.75 | This study |
| DY-41 | CaCl2 | 197763.17 | 902.25 | 71249.48 | 3392.21 | 914.45 | 117041.65 | 493.00 | 188.37 | 1752.49 | 105.38 | 27.60 | 431.25 | This study |
| DY-42 | CaCl2 | 194462.12 | 816.00 | 69985.38 | 3411.06 | 905.87 | 115093.78 | 475.75 | 172.72 | 1704.99 | 96.32 | 31.20 | 407.75 | This study |
| DY-43 | CaCl2 | 193618.45 | 835.75 | 70339.12 | 3102.46 | 790.14 | 114755.02 | 435.75 | 202.86 | 1734.78 | 191.52 | 36.38 | 391.25 | This study |
| DY-45 | CaCl2 | 190740.04 | 766.75 | 69480.28 | 3098.22 | 726.98 | 113399.98 | 308.25 | 202.86 | 1608.39 | 160.96 | 43.63 | 306.25 | This study |
| DY-46 | CaCl2 | 186424.57 | 722.75 | 68204.81 | 2932.38 | 576.10 | 110435.83 | 400.25 | 246.91 | 1737.19 | 194.22 | 48.00 | 298.00 | This study |
| DY-47 | CaCl2 | 185527.71 | 641.50 | 66824.68 | 3382.79 | 954.45 | 110012.38 | 220.15 | 243.43 | 1989.96 | 170.98 | 71.23 | 331.00 | This study |
| DY-48 | CaCl2 | 180919.88 | 732.40 | 63545.65 | 4270.72 | 1098.13 | 108795.63 | 407.10 | 198.03 | 1279.63 | 118.26 | 34.34 | 332.30 | This study |
| DY-49 | CaCl2 | 186546.79 | 776.25 | 68150.84 | 2864.53 | 644.68 | 110435.83 | 394.50 | 173.88 | 1828.16 | 245.64 | 42.53 | 352.25 | This study |
| DY-50 | CaCl2 | 188591.16 | 840.50 | 69054.64 | 2676.08 | 667.55 | 111452.11 | 483.50 | 176.78 | 1927.17 | 302.06 | 42.53 | 348.50 | This study |
| DY-51 | CaCl2 | 184172.85 | 750.50 | 66542.53 | 3324.37 | 713.27 | 108996.09 | 284.75 | 230.68 | 1826.55 | 524.73 | 57.93 | 298.50 | This study |
| DY-52 | CaCl2 | 180133.44 | 904.25 | 65245.12 | 3056.76 | 708.70 | 106540.08 | 391.50 | 197.06 | 1875.65 | 253.87 | 75.30 | 267.50 | This study |
| DY-53 | CaCl2 | 186697.85 | 879.75 | 68182.76 | 2743.00 | 714.00 | 110266.45 | 459.50 | 245.75 | 2033.43 | 265.49 | 58.20 | 274.25 | This study |
| DY-54 | CaCl2 | 194089.99 | 878.50 | 70732.45 | 3094.45 | 662.97 | 115178.47 | 385.25 | 250.39 | 1583.44 | 280.80 | 37.98 | 333.75 | This study |
| DY-55 | CaCl2 | 189117.31 | 727.00 | 67474.43 | 4098.92 | 945.88 | 112807.15 | 133.33 | 133.89 | 1651.06 | 118.32 | 71.38 | 379.00 | This study |
| DY-56 | CaCl2 | 192381.03 | 861.25 | 69776.69 | 3429.90 | 667.55 | 114416.26 | 248.95 | 186.05 | 1601.95 | 152.42 | 42.15 | 371.00 | This study |
| DY-57 | CaCl2 | 183032.67 | 922.25 | 67008.91 | 2679.47 | 593.87 | 108233.88 | 407.00 | 179.67 | 1912.68 | 159.33 | 59.98 | 262.00 | This study |
| DY-58 | CaCl2 | 186080.65 | 946.75 | 67384.80 | 3194.33 | 748.70 | 110181.76 | 424.00 | 154.75 | 1930.39 | 159.64 | 83.28 | 286.50 | This study |
| DY-59 | CaCl2 | 184416.84 | 1097.00 | 65669.39 | 3816.24 | 914.45 | 109250.17 | 385.50 | 162.29 | 1960.98 | 108.00 | 112.98 | 352.50 | This study |
| DY-60 | CaCl2 | 184310.68 | 910.75 | 66946.08 | 3012.07 | 757.07 | 109080.78 | 422.50 | 185.47 | 2006.06 | 124.05 | 75.30 | 247.48 | This study |
| DY-61 | CaCl2 | 181863.93 | 1127.25 | 65381.28 | 3373.37 | 754.42 | 107386.98 | 470.75 | 162.29 | 2092.20 | 132.43 | 98.18 | 271.00 | This study |
| DY-62 | CaCl2 | 190418.34 | 1037.25 | 69068.28 | 3105.50 | 793.33 | 112468.39 | 686.50 | 197.06 | 2072.07 | 99.81 | 79.55 | 267.50 | This study |
| DY-63 | CaCl2 | 182324.48 | 931.00 | 65588.55 | 3439.33 | 803.00 | 107810.43 | 450.50 | 169.82 | 2079.32 | 145.37 | 93.10 | 289.50 | This study |
| DY-64 | CaCl2 | 182173.40 | 1168.75 | 65285.95 | 3434.61 | 834.43 | 107641.05 | 446.75 | 151.27 | 2094.61 | 171.27 | 101.13 | 302.00 | This study |
| DY-65 | CaCl2 | 181942.31 | 1077.50 | 65150.89 | 3533.55 | 803.00 | 107471.67 | 461.25 | 197.64 | 2019.75 | 117.08 | 102.25 | 280.50 | This study |
| DY-66 | CaCl2 | 183115.36 | 1398.75 | 65424.06 | 3652.28 | 596.68 | 107556.36 | 763.25 | 243.43 | 2006.06 | 105.46 | 81.15 | 232.10 | This study |
| DY-67 | CaCl2 | 181832.65 | 1250.75 | 64876.41 | 3693.74 | 760.13 | 107302.29 | 467.50 | 157.07 | 2099.44 | 138.27 | 107.70 | 286.75 | This study |
| DY-68 | CaCl2 | 181246.06 | 1141.00 | 65011.27 | 3349.81 | 825.86 | 107132.91 | 408.75 | 179.67 | 1992.38 | 147.90 | 92.13 | 291.25 | This study |
| DY-69 | CaCl2 | 181779.26 | 889.00 | 65405.52 | 3392.21 | 800.14 | 107471.67 | 434.50 | 171.56 | 2018.14 | 132.34 | 94.90 | 305.50 | This study |
| DY-70 | CaCl2 | 183436.10 | 933.50 | 66044.70 | 3297.98 | 828.72 | 108318.57 | 470.50 | 215.61 | 2060.00 | 143.78 | 91.30 | 286.75 | This study |
| DY-71 | CaCl2 | 180894.89 | 1301.00 | 64615.24 | 3392.21 | 885.87 | 106878.84 | 499.00 | 162.87 | 1974.67 | 125.26 | 105.33 | 272.25 | This study |
| DY-72 | CaCl2 | 182581.82 | 913.00 | 65782.57 | 3108.62 | 772.70 | 109516.93 | 342.00 | 178.83 | 1499.88 | 120.43 | 89.60 | 238.20 | This study |
| DY-73 | CaCl2 | 183197.36 | 813.25 | 65715.49 | 3463.82 | 939.59 | 108318.57 | 446.25 | 250.39 | 2057.58 | 126.79 | 97.33 | 284.00 | This study |
| DY-74 | CaCl2 | 181770.91 | 1696.00 | 64675.30 | 3392.21 | 860.15 | 106624.77 | 614.25 | 156.49 | 2513.21 | 68.99 | 133.53 | 346.50 | This study |
| DY-75 | CaCl2 | 179814.16 | 1128.75 | 64080.76 | 3580.67 | 891.58 | 106455.39 | 337.50 | 190.11 | 1873.24 | 141.12 | 131.05 | 377.50 | This study |
| DY-76 | CaCl2 | 183455.69 | 877.75 | 64423.27 | 4353.34 | 1225.36 | 108996.09 | 426.25 | 144.90 | 1932.81 | 68.46 | 102.33 | 284.25 | This study |
| DY-77 | CaCl2 | 181036.24 | 953.00 | 64606.74 | 3624.95 | 972.40 | 107556.36 | 378.25 | 156.49 | 1729.95 | 107.20 | 95.08 | 261.00 | This study |
| DY-78 | CaCl2 | 182024.14 | 816.50 | 65307.65 | 3449.31 | 947.47 | 107979.81 | 418.75 | 194.16 | 1825.74 | 118.99 | 92.55 | 258.25 | This study |
| DY-79 | CaCl2 | 185282.25 | 809.00 | 66128.31 | 3774.43 | 1020.00 | 110012.38 | 360.75 | 155.33 | 1902.22 | 144.26 | 89.33 | 283.75 | This study |
| DY-80 | CaCl2 | 185392.65 | 684.50 | 66339.78 | 3927.65 | 906.67 | 110520.52 | 289.50 | 156.49 | 1605.17 | 130.50 | 80.40 | 253.50 | This study |
| DY-81 | CaCl2 | 187190.26 | 684.50 | 67065.36 | 3811.80 | 974.67 | 111706.18 | 286.25 | 144.90 | 1541.58 | 138.47 | 68.60 | 249.30 | This study |
| DY-82 | CaCl2 | 188649.58 | 616.75 | 67974.36 | 3382.04 | 1094.80 | 112553.08 | 277.00 | 185.47 | 1605.98 | 123.51 | 66.90 | 264.00 | This study |
| DY-83 | CaCl2 | 184404.72 | 981.10 | 67014.82 | 2739.08 | 688.40 | 110331.46 | 366.60 | 219.03 | 1577.48 | 127.13 | 67.13 | 232.70 | This study |
| DY-84 | CaCl2 | 184121.12 | 680.25 | 66534.75 | 2952.28 | 956.53 | 109165.47 | 353.00 | 190.11 | 1610.00 | 57.20 | 69.40 | 212.65 | This study |
| DY-85 | CaCl2 | 182365.12 | 1130.25 | 65554.39 | 3161.35 | 940.16 | 108149.19 | 422.25 | 174.46 | 1799.98 | 87.29 | 90.55 | 243.85 | This study |
| DY-86 | CaCl2 | 182835.17 | 848.75 | 65667.68 | 3395.98 | 937.31 | 108318.57 | 423.50 | 209.23 | 1932.81 | 83.22 | 93.60 | 251.50 | This study |
| DY-87 | CaCl2 | 181917.73 | 1323.75 | 65046.38 | 3293.27 | 928.73 | 107386.98 | 496.75 | 191.85 | 2084.15 | 86.51 | 102.25 | 267.00 | This study |
| DY-88 | CaCl2 | 182867.09 | 1294.00 | 64915.35 | 3611.67 | 808.50 | 109294.79 | 545.30 | 190.83 | 1682.45 | 115.84 | 104.90 | 250.50 | This study |
| SZG28 | CaCl2 | 134300.00 | 1470.00 | 49910.00 | 680.00 | 290.00 | 78530.00 | 1940.00 | 58.39 | 1240.00 | 28.00 | 27.18 | 106.00 | Liu et al., 2019 |
| SZG24 | CaCl2 | 329600.00 | 6900.00 | 120500.00 | 160.00 | 20.00 | 186800.00 | 11180.00 | 0.00 | 4030.00 | 29.60 | 1.24 | 11.38 | Liu et al., 2019 |
| SZG40 | CaCl2 | 312700.00 | 5430.00 | 114600.00 | 260.00 | 20.00 | 177000.00 | 11060.00 | 0.00 | 440.00 | 38.53 | 3.02 | 17.88 | Liu et al., 2019 |
| SZG201 | CaCl2 | 308700.00 | 7340.00 | 113000.00 | 250.00 | 130.00 | 174700.00 | 8560.00 | 198.70 | 4460.00 | 0.30 | 0.65 | 8.25 | Liu et al., 2019 |
| YSS | CaCl2 | 197900.00 | 299.00 | 68480.00 | 6510.00 | 1300.00 | 120000.00 | 571.00 | 72.00 | 1613.95 | 98.00 | 2.10 | 253.00 | Tan et al., 2007 |
| YDZ | CaCl2 | 320400.00 | 2500.00 | 117800.00 | 4840.00 | 839.00 | 192200.00 | 1340.00 | 232.00 | 3120.34 | 59.50 | 20.90 | 116.00 | Tan et al., 2007 |
| YDZ | CaCl2 | 318900.00 | 1840.00 | 116600.00 | 4450.00 | 1790.00 | 191800.00 | 1560.00 | 307.00 | 2540.07 | 79.30 | 13.00 | 85.40 | Tan et al., 2007 |
| XLS | CaCl2 | 154100.00 | 840.00 | 57250.00 | 1580.00 | 330.00 | 89010.00 | 2050.00 | 0.00 | 543.56 | 54.80 | 36.00 | 7.50 | Tan et al., 2007 |
| NYS-01 | CaCl2 | 324610.00 | 4210.00 | 105710.00 | 12920.00 | 2480.00 | 194440.00 | 660.00 | 530.00 | 5641.73 | 84.00 | 175.00 | 536.00 | Li et al., 2007 |
| NYS-02 | CaCl2 | 326380.00 | 3890.00 | 106620.00 | 12880.00 | 2500.00 | 195640.00 | 670.00 | 540.00 | 5622.41 | 91.00 | 175.00 | 528.00 | Li et al., 2007 |
| YDZ-2-01 | CaCl2 | 321510.00 | 2500.00 | 117770.00 | 4840.00 | 840.00 | 192200.00 | 1340.00 | 230.00 | 3123.56 | 60.00 | 21.00 | 116.00 | Li et al., 2007 |
| YDZ-2-02 | CaCl2 | 319790.00 | 1840.00 | 116600.00 | 4450.00 | 1790.00 | 191750.00 | 1560.00 | 310.00 | 2537.49 | 79.00 | 13.00 | 85.00 | Li et al., 2007 |
| ZK-5034 # | CaCl2 | 208590.00 | 300.00 | 68480.00 | 6510.00 | 1300.00 | 129990.00 | 570.00 | 70.00 | 1616.52 | 98.00 | 2.00 | 253.00 | Li et al., 2007 |
| XLS-01 | CaCl2 | 154100.00 | 480.00 | 57250.00 | 1580.00 | 330.00 | 89010.00 | 2050.00 | 0.00 | 540.99 | 55.00 | 36.00 | 8.00 | Li et al., 2007 |
| NYS-01 | CaCl2 | 280190.00 | 5680.00 | 91720.00 | 10950.00 | 1400.00 | 166670.00 | 570.00 | 370.00 | 2630.00 | 49.81 | 175.36 |  | Li et al., 2013 |
| NYS-02 | CaCl2 | 136570.00 | 2850.00 | 42760.00 | 6970.00 | 750.00 | 81410.00 | 180.00 | 210.00 | 1320.00 | 13.95 | 110.10 |  | Li et al., 2013 |
| NYS-03 | CaCl2 | 269440.00 | 8460.00 | 82990.00 | 13970.00 | 870.00 | 159860.00 | 220.00 | 130.00 | 2680.00 | 36.45 | 237.50 |  | Li et al., 2013 |
| NYS-04 | CaCl2 | 160270.00 | 1050.00 | 59280.00 | 1980.00 | 460.00 | 93880.00 | 1250.00 | 310.00 | 2040.00 | 42.13 | 26.31 |  | Li et al., 2013 |
| NYS-05 | CaCl2 | 258670.00 | 3700.00 | 85770.00 | 10510.00 | 1060.00 | 154200.00 | 470.00 | 240.00 | 2510.00 | 45.50 | 164.80 |  | Li et al., 2013 |
| SZG-02 | CaCl2 | 76620.00 | 450.00 | 24370.00 | 940.00 | 2490.00 | 42510.00 | 5280.00 | 220.00 | 360.00 | 0.89 | 2.40 |  | Li et al., 2013 |
| SZG-04 | CaCl2 | 113550.00 | 250.00 | 41850.00 | 1410.00 | 430.00 | 65120.00 | 3120.00 | 860.00 | 530.00 | 0.53 | 0.88 |  | Li et al., 2013 |
| XLS-03 | CaCl2 | 170560.00 | 290.00 | 62920.00 | 2430.00 | 720.00 | 100160.00 | 1320.00 | 510.00 | 2170.00 | 0.38 | 26.00 |  | Li et al., 2013 |
| XLS-04 | CaCl2 | 177730.00 | 390.00 | 65220.00 | 2660.00 | 760.00 | 103420.00 | 2290.00 | 800.00 | 2190.00 | 0.34 | 2.94 |  | Li et al., 2013 |
| XLS-05 | CaCl2 | 260250.00 | 5520.00 | 76510.00 | 260.00 | 12820.00 | 148180.00 | 14880.00 | 970.00 | 1050.00 | 48.88 | 5.98 |  | Li et al., 2013 |
| XLS-06 | CaCl2 | 155760.00 | 2160.00 | 56490.00 | 270.00 | 1570.00 | 90760.00 | 4000.00 | 150.00 | 320.00 | 14.73 | 2.67 |  | Li et al., 2013 |
| XLS-07 | CaCl2 | 167090.00 | 620.00 | 61120.00 | 1980.00 | 1080.00 | 98540.00 | 2960.00 | 310.00 | 490.00 | 0.79 | 2.34 |  | Li et al., 2013 |
| YQZ-01 | CaCl2 | 210950.00 | 720.00 | 78040.00 | 2330.00 | 1090.00 | 124940.00 | 1480.00 | 410.00 | 1920.00 | 1.12 | 19.19 |  | Li et al., 2013 |
| YQZ-02 | CaCl2 | 204880.00 | 660.00 | 75940.00 | 1990.00 | 1170.00 | 121310.00 | 1390.00 | 460.00 | 1940.00 | 1.35 | 17.79 |  | Li et al., 2013 |
| YQZ-03 | CaCl2 | 214130.00 | 690.00 | 78660.00 | 2510.00 | 1360.00 | 126240.00 | 1560.00 | 570.00 | 2510.00 | 2.23 | 28.83 |  | Li et al., 2013 |
| YQZ-04 | CaCl2 | 218000.00 | 690.00 | 78920.00 | 3100.00 | 1780.00 | 129010.00 | 1240.00 | 480.00 | 2680.00 | 57.25 | 43.92 |  | Li et al., 2013 |
| YQZ-05 | CaCl2 | 207560.00 | 760.00 | 71450.00 | 5310.00 | 2460.00 | 125170.00 | 220.00 | 200.00 | 1890.00 | 0.99 | 97.80 |  | Li et al., 2013 |
| YDZ-01 | CaCl2 | 316000.00 | 1710.00 | 116800.00 | 4420.00 | 820.00 | 189350.00 | 1110.00 | 210.00 | 1470.00 | 64.15 | 29.14 |  | Li et al., 2013 |
| GS-01 | CaCl2 | 73420.00 | 300.00 | 25680.00 | 1820.00 | 590.00 | 43820.00 | 430.00 | 270.00 | 490.00 | 16.50 | 5.63 |  | Li et al., 2013 |
| GS-03 | CaCl2 | 80400.00 | 820.00 | 29040.00 | 1450.00 | 160.00 | 47140.00 | 820.00 | 310.00 | 620.00 | 13.65 | 13.90 |  | Li et al., 2013 |
| GS-04 | CaCl2 | 59550.00 | 430.00 | 21810.00 | 830.00 | 120.00 | 33980.00 | 1330.00 | 440.00 | 590.00 | 18.18 | 10.59 |  | Li et al., 2013 |
| GS-05 | CaCl2 | 77750.00 | 480.00 | 28410.00 | 1220.00 | 200.00 | 45160.00 | 1100.00 | 460.00 | 1700.00 | 14.00 | 14.01 |  | Li et al., 2013 |
| KB-03 | CaCl2 | 18600.00 | 57.00 | 6290.00 | 730.00 | 113.00 | 11150.00 | 15.00 | 68.00 | 160.00 | 5.03 | 0.54 |  | Li et al., 2013 |
| DFS-01 | CaCl2 | 173250.00 | 1280.00 | 60090.00 | 4880.00 | 1100.00 | 103820.00 | 240.00 | 130.00 | 1510.00 | 36.35 | 158.20 |  | Li et al., 2013 |
| DFS-02 | CaCl2 | 170520.00 | 1620.00 | 58990.00 | 4840.00 | 980.00 | 102050.00 | 210.00 | 210.00 | 1450.00 | 37.06 | 139.60 |  | Li et al., 2013 |
| LH-01 | CaCl2 | 42160.00 | 120.00 | 11830.00 | 3460.00 | 470.00 | 25000.00 | 490.00 | 780.00 | 56.00 | 4.48 | 1.14 |  | Li et al., 2013 |
| LH-02 | CaCl2 | 46850.00 | 73.00 | 12570.00 | 3310.00 | 1410.00 | 29160.00 | 270.00 | 74.00 | 20.00 | 4.83 | 0.85 |  | Li et al., 2013 |
| LH-03 | CaCl2 | 30660.00 | 44.00 | 8570.00 | 1820.00 | 940.00 | 19110.00 | 45.00 | 100.00 | 13.00 | 4.94 | 0.43 |  | Li et al., 2013 |
| LH-04 | CaCl2 | 32430.00 | 47.00 | 8960.00 | 1840.00 | 1130.00 | 20350.00 | 8.00 | 76.00 | 11.00 | 5.84 | 0.29 |  | Li et al., 2013 |
| YSS-01 | CaCl2 | 93260.00 | 370.00 | 32720.00 | 2550.00 | 560.00 | 55960.00 | 330.00 | 130.00 | 610.00 | 20.85 | 7.81 |  | Li et al., 2013 |
| YSS-02 | CaCl2 | 114800.00 | 220.00 | 38110.00 | 4620.00 | 1200.00 | 70320.00 | 14.00 | 18.00 | 260.00 | 35.25 | 1.69 |  | Li et al., 2013 |
| YSS-03 | CaCl2 | 162300.00 | 340.00 | 55280.00 | 6050.00 | 1110.00 | 98920.00 | 61.00 | 58.00 | 430.00 | 51.58 | 4.99 |  | Li et al., 2013 |
| YSS-04 | CaCl2 | 127830.00 | 720.00 | 46340.00 | 2630.00 | 300.00 | 75980.00 | 530.00 | 170.00 | 1110.00 | 29.75 | 30.98 |  | Li et al., 2013 |
| YSS-05 | CaCl2 | 5590.00 | 31.00 | 1830.00 | 240.00 | 44.00 | 3270.00 | 34.00 | 84.00 | 55.00 | 0.97 | 0.13 |  | Li et al., 2013 |
| N6（1） | CaCl2 | 282200.00 | 7520.00 | 85680.00 | 15860.00 | 1090.00 | 169000.00 | 220.00 | 183.00 | 2426.00 | 46.20 | 253.00 |  | Li et al., 2015 |
| N6（2） | CaCl2 | 282400.00 | 7550.00 | 85720.00 | 15990.00 | 1140.00 | 169000.00 | 170.00 | 101.70 | 2453.00 | 46.20 | 253.00 |  | Li et al., 2015 |
| N6（3） | CaCl2 | 282200.00 | 7600.00 | 85770.00 | 15730.00 | 1150.00 | 169000.00 | 170.00 | 56.82 | 2455.00 | 43.80 | 254.00 |  | Li et al., 2015 |
| N6（4） | CaCl2 | 286600.00 | 7580.00 | 87260.00 | 15830.00 | 1120.00 | 171700.00 | 170.00 | 0.00 | 2575.00 | 73.00 | 255.00 |  | Li et al., 2015 |
| N6（5） | CaCl2 | 285000.00 | 7580.00 | 86360.00 | 16090.00 | 1060.00 | 170800.00 | 180.00 | 103.50 | 2507.00 | 46.40 | 255.00 |  | Li et al., 2015 |
| N2-3（1） | CaCl2 | 285000.00 | 7660.00 | 84920.00 | 15750.00 | 1380.00 | 170300.00 | 320.00 | 0.00 | 2540.00 |  | 254.00 |  | Li et al., 2015 |
| N2-3（2） | CaCl2 | 283600.00 | 7660.00 | 83660.00 | 15780.00 | 1330.00 | 170300.00 | 360.00 | 0.00 | 2393.00 |  | 255.00 |  | Li et al., 2015 |
| N2-3（3） | CaCl2 | 279900.00 | 7580.00 | 82950.00 | 15750.00 | 1360.00 | 167300.00 | 320.00 | 0.00 | 2441.00 |  | 255.00 |  | Li et al., 2015 |
| N2-3（4） | CaCl2 | 283600.00 | 7660.00 | 84330.00 | 15830.00 | 1280.00 | 169300.00 | 290.00 | 0.00 | 2591.00 |  | 261.00 |  | Li et al., 2015 |
| N2-3（5） | CaCl2 | 284700.00 | 7600.00 | 83540.00 | 15950.00 | 1360.00 | 171200.00 | 340.00 | 0.00 | 2445.00 |  | 254.00 |  | Li et al., 2015 |
| N13（1） | CaCl2 | 285500.00 | 5210.00 | 87580.00 | 14730.00 | 1490.00 | 172200.00 | 270.00 | 0.00 | 2531.00 |  | 230.00 |  | Li et al., 2015 |
| N13（2） | CaCl2 | 291100.00 | 5240.00 | 89780.00 | 15170.00 | 1520.00 | 175200.00 | 240.00 | 0.00 | 2512.00 |  | 230.00 |  | Li et al., 2015 |
| N13（3） | CaCl2 | 287100.00 | 5230.00 | 88890.00 | 14960.00 | 1510.00 | 172200.00 | 300.00 | 0.00 | 2527.00 |  | 230.00 |  | Li et al., 2015 |
| N13（4） | CaCl2 | 286000.00 | 5240.00 | 87930.00 | 14830.00 | 1480.00 | 172200.00 | 300.00 | 0.00 | 2514.00 |  | 231.00 |  | Li et al., 2015 |
| N13（5） | CaCl2 | 293000.00 | 5240.00 | 90400.00 | 15360.00 | 1530.00 | 176200.00 | 300.00 | 0.00 | 2533.00 |  | 230.00 |  | Li et al., 2015 |
